# Supplementary material for: Seven benzimidazole pesticides combined at sub-threshold levels induce micronuclei in vitro
Source: PubMed Central journal article supplement — Mutagenesis. 2013 Apr 1;28(4):417–26. doi: 10.1093/mutage/get019 (PMC3681538; doi:10.1093/mutage/get019), 2013-04-01

### **Supplementary material:**

The following figures show concentration-response data for cytotoxicity determined in the MTT and the Cytokinesis Block Proliferation Index (CBPI) assessed in the CBMN assay for eight benzimidazoles (Figure S1) and their mixture (Figure S2). The CBPI was calculated from the data acquired during automated image analysis for MN scoring using the following equation (26;51):

$$\text{CBPI} = \frac{(\text{No. of mononucleated cells}) + (2 \times \text{No. of bn cells}) + (3 \times \text{No. of polynucleated cells})}{\text{total No. of cells}}$$

The figures demonstrate that the CBPI was essentially insensitive to cytotoxicity revealed by the MTT assay. This was observed for both, the single compounds (Figure S1) and the mixture (Figure S2).

Figure S1: Cytotoxicity determined in the MTT assay (left) and the CBPI (right) for eight benzimidazole pesticides.

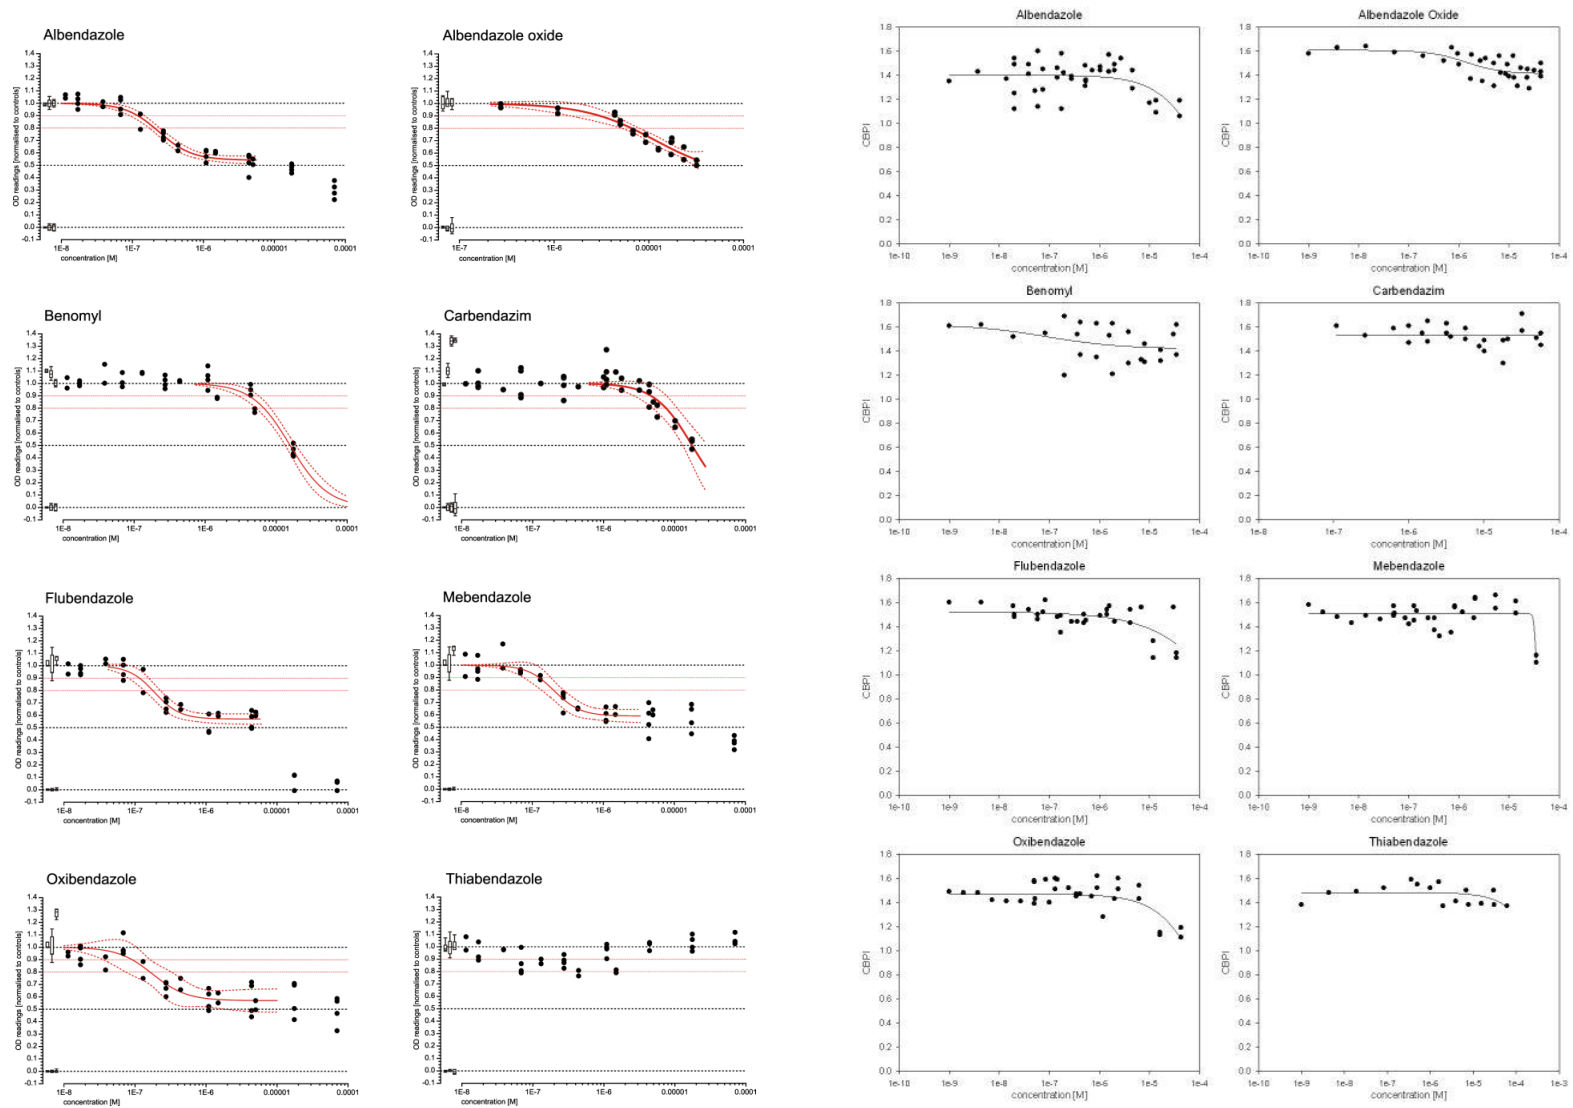

Figure S2: Cytotoxicity determined in the MTT assay (left) and the CBPI (right) for a mixture of seven benzimidazole pesticides.

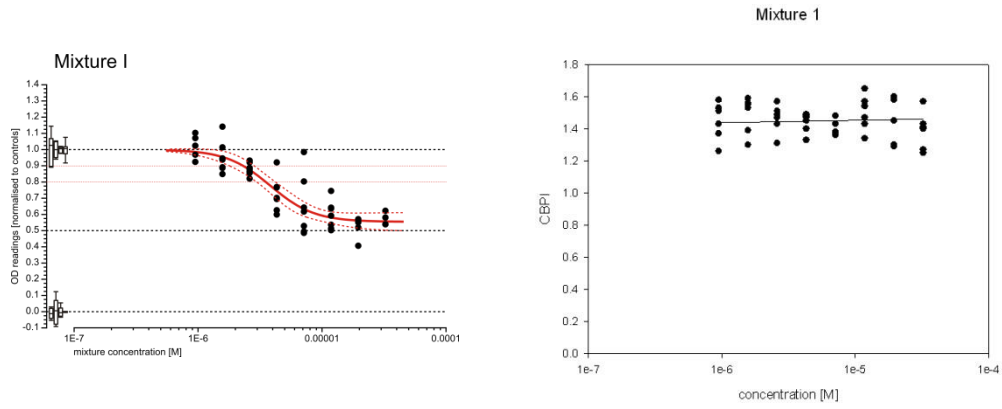

Supplement: supp_get019_Ermler_et_al.Supplementary_material.pdf [file supp_get019_Ermler_et_al.Supplementary_material.pdf]
